# Supplementary material
Source: ML conference proceedings conference paper supplement (https://openreview.net/forum?id=G6S9B7fr74)
Supplement: supplementary_material [file attachment]

## Sheet: yelp
WS Predicate	WS Name	Predicate	Kind	Type	Name	Enum Values	Description	Don't Ask	Required	Confirm	Actions	WS Actions
	UserInfo			worksheet
			input	Enum	user_task		The task that the user wants to perform		TRUE
						Book Restaurant
			internal	bool	exit			TRUE
user_task == "Book Restaurant"	BookRestaurant			worksheet								>say(book_restaurant_yelp(self.restaurant, self.date, self.time, self.number_of_people, self.special_request_info))
			input	Restaurant	restaurant		The restuarant that the user wants to book		TRUE	TRUE
			input	date	date		The date of the reservation		TRUE
			input	time	time		The time of the reservation		TRUE
			input	int	number_of_people		Number of people the user wants to book for		TRUE
			input	str	special_request_info		Any special request or information for the restaurant	TRUE
		self.restaurant is not None and self.date is not None and self.time is not None	input	confirm	confirm		Confirm that the user wants to Book the restaurant with the currently set parameters.		TRUE		if self.confirm == False: >say("Thank you, can i assist you in any other way?")
	restaurants			db
			internal; primary	str	id		The unique id of the restaurant
			internal	str	name		Name of the restaurant
			internal	List[str]	cuisines		Cuisines served at the restaurant
			internal	Enum	price		Price range of the restaurant
						cheap
						moderate
						expensive
						luxury
			internal	float	rating		Average rating of the restaurant
			internal	int	num_reviews		Number of reviews the restaurant has
			internal	str	address		Address of the restaurant
			internal	List[str]	popular_dishes		Popular dishes served at the restaurant
			internal	str	phone_number		Phone number of the restaurant
			internal	str	location		Location of the restaurant		TRUE
			internal	List[str]	opening_hours		Opening hours of the restaurant
			internal	str	summary		Summary of reviews of the restaurant
			internal	List[str]	reviews		All the reviews of the restaurant
			internal	str	answer		Answer to any question asked.
			output	Restaurant
	yelp_general_info			db
	Restaurant			type								if user_task != "Book Restaurant": >propose(BookRestaurant, {"restaurant":self})
			internal; primary	str	id
			internal	str	name
			internal	List[str]	cuisines
			internal	Enum	price
						cheap
						moderate
						expensive
						luxury
			internal	float	rating
			internal	int	num_reviews
			internal	str	address
			internal	List[str]	popular_dishes
			internal	str	phone_number
			internal	str	location
			internal	List[str]	opening_hours
			internal	str	summary
