# Supplementary material
Source: ML conference proceedings conference paper supplement (https://openreview.net/forum?id=G6S9B7fr74)
Supplement: supplementary_material [file GenieWs_bank.xlsx]

## Sheet: bank
Form Predicate	Form Name	Predicate	Kind	Type	Name	Enum Values	Description	Don't Ask	Required	Confirm	Actions	Form Actions
	Main			worksheet	bank_fraud_report
			input	str	full_name		Full Name of the user		TRUE
			input	FirstAuthentication	first_authentication_details		The authentication details of the user such as account number and pin
		self.first_authentication_details is not None and (self.first_authentication_details.account_number == "NA" or self.first_authentication_details.pin == "NA")	input	SecondAuthentication	second_authentication_details		Ask for DOB or security questions because user doesn't know account number or pin
			internal	bool	authentication_complete				TRUE
		first_authentication_details.is_completed() or second_authentication_details.is_completed()	input	str	fraud_report		information about the fraud		TRUE
	FirstAuthentication			worksheet								if self.account_number != "NA" and self.account_number is not None and self.pin != "NA" and self.pin is not None: authentication_complete = True
		self.pin != "NA" and self.pin is not None	input	str	account_number		Bank account number of the user				if self.pin == "NA" and (self.account_number != "NA" and self.account_number is not None): self.pin = None
		self.account_number != "NA" and self.account_number is not None	input	str	pin		Bank account pin of the user				if self.account_number == "NA" and (self.pin != "NA" or self.pin is not None): self.account_number = None
FirstAuthenticationDetails.account_number == "NA" or FirstAuthenticationDetails.pin == "NA"	SecondAuthentication			worksheet								if self.date_of_birth != "NA" and self.date_of_birth is not None and self.security_answer_1 != "NA" and self.security_answer_1 is not None and self.security_answer_2 != "NA" and self.security_answer_2 is not None: authentication_complete= True
			input	str	date_of_birth		The date of birth of the user		TRUE
			input	str	security_answer_1		Answer to security question: "Mother's maiden name"		TRUE
			input	str	security_answer_2		Answer to security question: "Name of childhood pet"		TRUE
