# Supplementary material
Source: ML conference proceedings conference paper supplement (https://openreview.net/forum?id=G6S9B7fr74)
Supplement: supplementary_material [file GenieWS_course_assistant.xlsx]

## Sheet: enrollment
Form Predicate	Form Name	Predicate	Kind	Type	Name	Enum Values	Description	Don't Ask	Required	Confirm	Actions	Form Actions
	Main			worksheet	courses_to_take_oval
			input	CoursesToTake	courses_to_take		The courses that the student wants to take		TRUE
			input	StudentInfo	student_info_details		The details about the student such as name,student id, student email address, if they are international student		TRUE
			input	confirm	confirm_submission		Ask the student to confirm all the fields they want to submit		TRUE
	StudentInfo			worksheet
			input	str	student_name		The name of the student filling the form		TRUE
			input	str	student_id		Student's Identification Number		TRUE
			input	str	student_email_address		Email address of the student		TRUE
			input	bool	is_international_student		Is the student an international student		TRUE
	CoursesToTake			worksheet
			input	Course	course_0_details		The course details for first course, such as name, grade type and units		TRUE
			input	Course	course_1_details		The course details for second course, such as name, grade type and units		TRUE
			input	bool	more_courses_2		Does the user want to take more courses		TRUE
		not self.more_courses_2 == False	input	Course	course_2_details		The course details for third course, such as name, grade type and units
		not self.more_courses_2 == False	input	bool	more_courses_3		Does the user want to take more courses
		not self.more_courses_2 == False and not self.more_courses_3 == False	input	Course	course_3_details		The course details for fourth course, such as name, grade type and units
			input	confirm	confirm		Confirm all the course details before saving
	Course			worksheet
			input	str	course_name		Name of the course that the student wants to take		TRUE
			input	Enum	grade_type		The desired grading bases of the student		TRUE
						Credit/No Credit
						Letter
			input	int	course_num_units		The number of units the user want to take		TRUE
	courses			db
			internal; primary	int	course_id
			internal	int	max_units
			internal	str	title
			internal	str	grading
			internal	List[str]	course_codes
			internal	List[str]	general_requirements
			internal	int	min_units
			internal	str	description
			internal	int	average_hours_spent
			internal	Enum	foundations_requirements
						logic_automata_and_complexity
						probability
						algorithmic_analysis
						computer_organization_and_systems
						principles_of_computer_systems
			internal	bool	significant_implementation_requirements
			internal	Enum	breadth_requirement
						formal_foundations
						learning_and_modeling
						systems
						people_and_society
			internal	List[str]	prerequisite_course_codes
	offerings			db
			internal	int	course_id
			internal	Enum	days
						Monday
						Tuesday
						Wednesday
						Thursday
						Friday
						Saturday
						Sunday
			internal	str	start_time
			internal	str	end_time
			internal	List[str]	instructor_names
			internal	Enum	season
						autumn
						winter
						spring
						summer
	ratings			db
			internal; primary	int	rating_id
			internal	int	course_id
			internal	List[str]	instructor_names
			internal	int	average_rating
			internal	int	num_ratings
			internal	int	term_id
			internal	int	start_year
			internal	int	end_year
			internal	Enum	season
						autumn
						winter
						spring
						summer
			internal	List[str]	reviews
	programs			db
			internal; primary	int	program_id
			internal	Enum	level
						MS
						BS
						PhD
			internal	Enum	specialization
						AI
						Computational Biology
						Human-Computer Interaction
						Information Management & Analytics
						Visual Computing
						Software Theory
						Systems
						Theoretical Computer Science
						general
						Compuater & Network Security
			internal	str	sheet_requirements
			internal	str	sheet_url
			internal	str	sheet_path
