# Supplementary material
Source: ML conference proceedings conference paper supplement (https://openreview.net/forum?id=G6S9B7fr74)
Supplement: supplementary_material [file GenieWS_ticket_submissionxlsx.xlsx]

## Sheet: servicesbot
Form Predicate	Form Name	Predicate	Input/Internal	Type	Name	Enum Values	Description	Don't Ask	Required	Confirmation	Actions	Form Actions
	Main			worksheet	submit_api
			input	Enum	student_task		The type of request		TRUE
						Troubleshoot Student Enrollment
						Leave of Absence
						External Test Credits
		self.student_task == "Troubleshoot Student Enrollment"	input	TroubleShootStudentEnrollment	trouble_shoot_student_enrollment		The issues that the student is facing could be related to change course, join waitlist or other waitlist issues		TRUE
		self.student_task == "Leave of Absence"	input	LeaveOfAbsence	leave_of_absence		Issues with leave of absence, in checking Form Status, Discontinued Approved Leave, Discontinued Enrollment, Return Early		TRUE
		self.student_task == "External Test Credits"	input	ExternalTestCredits	external_test_credits		Issues related to external test credit on academic record		TRUE
		self.student_task is not None and (self.trouble_shoot_student_enrollment or self.leave_of_absence or self.external_test_credits)	input	str	extra_details		Ask for any other detail that the user wants to add		TRUE
			input	str	full_name		Full name of the student		TRUE
			input	confirm	confirm		Confirm that the student submit a ticket with the currently set parameters.		TRUE		if self.confirm == False: >say("Thank you, can i assist you in any other way?")
			internal	bool	exit			TRUE
student_task == "Troubleshoot Student Enrollment"	TroubleShootStudentEnrollment			worksheet
			input	Enum	trouble_shoot_specific_issue		The specific issue the student is facing		TRUE
						Change Course
						Join Waitlist
		self.trouble_shoot_specific_issue == "Change Course"	input	ChangeCourse	change_course_issues		Details related to change course issue		TRUE
		self.trouble_shoot_specific_issue == "Join Waitlist"	input	JoinWaitlist	join_waitlist		Details related to joining a waitlist for a course		TRUE
student_task == "Troubleshoot Student Enrollment" and trouble_shoot_specific_issue == "Change Course"	ChangeCourse			worksheet
			input	Enum	change_type		Type of course change the student wants to make		TRUE
						Add a Course
						Drop a Course
						Change Units
						Other Enrollement Issues
			input	str	course_code		The course code		TRUE
			input	str	issue_description		A description of the specific issue or question the student has		TRUE
student_task == "Troubleshoot Student Enrollment" and trouble_shoot_specific_issue == "Join Waitlist"	JoinWaitlist			worksheet
			input	str	course_name		Name of the desired course		TRUE
			input	str	issue_description		A description of the specific issue or question the student has		TRUE
			input	bool	waitlist_confirmation		Confirmation that the waitlist exists		TRUE
			input	bool	schedule_conflict		Whether or not the student has a schedule conflict with the waitlisted course		TRUE
student_task == "Leave of Absence"	LeaveOfAbsence			worksheet
			input	Enum	leave_of_absence_specific_issue		The specific issue the student is facing		TRUE
						Status of Leave of Absence form
						Others
		self.leave_of_absence_specific_issue == "Status of Leave of Absence form"	input	FormStatus	form_status		Details relating to a form status request		TRUE
			input	str	issue_description		A description of the specific issue the student is facing		TRUE
student_task == "Leave of Absence" and leave_of_absence_specific_issue == "Status of Leave of Absence form"	FormStatus			worksheet
			input	Enum	submission_method		Way in which the student submitted the form		TRUE
						Email
						In Person
						Through Staff
			input	str	submission_date		Date of submission		TRUE
student_task == "External Test Credits"	ExternalTestCredits			worksheet
			input	Enum	specific_issue		The specific issue the student is facing		TRUE
						Submit International Test Scores For Unit Award
						Missing or Incorrect Record
		self.specific_issue == "Missing or Incorrect Record"	input	Enum	test_issues		The issues with the test		TRUE
						Credit not posted
						Incorrect Units
		self.specific_issue == "Missing or Incorrect Record" and self.test_issues == "Credit not posted"	input	Enum	test_type		The type of test scores
						Advanced Placement (AP) Scores
						International Baccalaureate (IB) Scores
		self.specific_issue == "Missing or Incorrect Record" and self.test_issues == "Credit not posted"	input	str	time_of_test_score_submission		When were the test scores submitted
		self.specific_issue == "Submit International Test Scores For Unit Award"	input	Enum	type_of_international_test		The type of test the student wants to get credit for		TRUE
						Caribbean Advanced Placement Exam
						French Baccalaureate
						General Certificate of Education "A" levels
						German Abitur
						Irish Leaving Certificate
						NEWL (National Examinations in World Languages)
		self.specific_issue == "Submit International Test Scores For Unit Award"	input	Enum	subjects_for_unit_awards		Select the subjects for which the student is expecting unit awards		TRUE
						Chemistry
						Computer Science
						Economics
						Language
						Mathematics
						Physics
	services_general_info			db
