# Supplementary material
Source: ML conference proceedings conference paper supplement (https://openreview.net/forum?id=G6S9B7fr74)
Supplement: supplementary_material [file GenieWS_trip.xlsx]

## Sheet: Sheet1
Form Predicate	Form Name	Predicate	Kind	Type	Name	Enum Values	Description	Don't Ask	Required	Confirm	Actions	Form Actions
	TravelInformation			worksheet								>say(next_step_instruction(1, self.travel_mode, self.departure_location, self.arrival_location, self.departure_time)) propose(ContinueDetails, {"show_next_step": True})
			input	Enum	travel_mode		The mode of transportation for the user		TRUE
						Transit
						Driving
						Walking
			internal	str	departure_location		The departure location of the user		TRUE
			internal	str	arrival_location		The arrival location of the user		TRUE
			internal	str	departure_time		the departue time of the user		TRUE
	ContinueDetails			worksheet
			input	bool	show_next_step		The user wants to know the next step				if self.show_next_step: if self.current_step is None: self.current_step = 2 >say(next_step_instruction(self.current_step, travel_mode, departure_location, arrival_location, departure_time)) self.current_step += 1 self.show_next_step = None else: if self.current_step is None: self.current_step = 1 >say(next_step_detailed(self.current_step, travel_mode, departure_location, arrival_location, departu…
			internal	int	current_step
