# Supplementary material
Source: ML conference proceedings conference paper supplement (https://openreview.net/forum?id=G6S9B7fr74)
Supplement: supplementary_material [file GenieWS_trivia.xlsx]

## Sheet: Sheet3
Form Predicate	Form Name	Predicate	Kind	Type	Name	Enum Values	Description	Don't Ask	Required	Confirm	Actions	Form Actions
	Main			worksheet
			input	int	starting_question_number		The Question number from which the user wants to start playing				self.current_question_number = self.starting_question_number say(>ask_question(self.starting_question_number)) question_answer = QuestionAnswer.new({"question": >ask_question(self.starting_question_number)})
			internal	int	current_question_number
			internal	int	correct_answers
	QuestionAnswer			worksheet
			internal	str	question		The question to ask
			input	str	user_answer		User's answer to the asked question				say(>check_user_answer(current_question_number, self.user_answer)) if >check_user_answer(current_question_number, self.user_answer): if correct_answers is None: correct_answers = 0 correct_answers += 1 self.continue_trivia = None
			input	bool	continue_trivia		Does the user want to continue the trivia?				if self.continue_trivia: current_question_number += 1 say(>ask_question(current_question_number)) self.question = >ask_question(current_question_number) self.user_answer = None else: say(f"Correct Answer: {correct_answers}. Incorrect Answer: {current_question_number - starting_question_number + 1}")
